# Supplementary material
Source: PubMed Central journal article supplement (PMC187757)
Supplement: pnas_100_17_10043__6.pdf [file pnas_100_17_10043__6.pdf]

**Table 1. Quantitative analysis of *Mrg* and sensory neuron marker coexpression within rat DRG neurons**

| Percentage of cells that coexpress the indicated genes relative to the reference gene $\pm$ SEM |                        |                         |                        |                         |                        |                         |                          |                          |
|-------------------------------------------------------------------------------------------------|------------------------|-------------------------|------------------------|-------------------------|------------------------|-------------------------|--------------------------|--------------------------|
| <u>Mrg*</u>                                                                                     | <u>IB4+Mrg*</u><br>IB4 | <u>IB4+Mrg*</u><br>Mrg* | <u>Ret+Mrg*</u><br>Ret | <u>Ret+Mrg*</u><br>Mrg* | <u>VR1+Mrg*</u><br>VR1 | <u>VR1+Mrg*</u><br>Mrg* | <u>P2X3+Mrg*</u><br>P2X3 | <u>P2X3+Mrg*</u><br>Mrg* |
| <i>rMrgB4</i>                                                                                   | 28.8 $\pm$ 0.9         | 97.3 $\pm$ 1.5          | 24.6 $\pm$ 2.4         | 97.5 $\pm$ 1.4          | 0                      | 0                       | 27.3 $\pm$ 2.3           | 98.4 $\pm$ 1.0           |
| <i>rMrgC</i>                                                                                    | 13.0 $\pm$ 2.2         | 97.4 $\pm$ 2.6          | 9.3 $\pm$ 2.7          | 100 $\pm$ 0             | 1.1 $\pm$ 1.1          | 7.1 $\pm$ 7.1           | 14.3 $\pm$ 6.7           | 91.9 $\pm$ 4.9           |
| <i>rMrgD</i>                                                                                    | 48.0 $\pm$ 1.6         | 100 $\pm$ 0             | 44.1 $\pm$ 2.8         | 98.8 $\pm$ 0.7          | 50.9 $\pm$ 8.0         | 98.2 $\pm$ 1.1          | 50.6 $\pm$ 3.9           | 100 $\pm$ 0              |

At least three Sprague–Dawley adult DRGs were analyzed by confocal microscopy to determine the extent of colocalization between probe combinations. With the exception of c-Ret, all cells detected by the probes were included in the counts. For the c-Ret probe, very large and small diameter cells were clearly distinguishable. We did not include large-diameter c-Ret<sup>+</sup> cells in our counts. These cells represented a very small fraction of the total number of c-Ret<sup>+</sup> cells ( $\approx$ 2%) and were never *Mrg*<sup>+</sup>.
