# Supplementary material
Source: PubMed Central journal article supplement (PMC187757)
Supplement: pnas_100_17_10043__7.pdf [file pnas_100_17_10043__7.pdf]

**Table 2. Quantitative analysis of *Mrg* receptors coexpressed within rat DRG neurons**Percentage of cells that coexpress the indicated *Mrgs* relative to the reference gene  
± SEM

| <i>Mrg</i> *  | $\frac{\text{MrgB4+Mrg}^*}{\text{MrgB4}}$ | $\frac{\text{MrgB4+Mrg}^*}{\text{Mrg}^*}$ | $\frac{\text{MrgC+Mrg}^*}{\text{MrgC}}$ | $\frac{\text{MrgC+Mrg}^*}{\text{Mrg}^*}$ | $\frac{\text{MrgD+Mrg}^*}{\text{MrgD}}$ | $\frac{\text{MrgD+Mrg}^*}{\text{Mrg}^*}$ |
|---------------|-------------------------------------------|-------------------------------------------|-----------------------------------------|------------------------------------------|-----------------------------------------|------------------------------------------|
| <i>rMrgA</i>  | N.D.                                      | N.D.                                      | N.D.                                    | N.D.                                     | 91.5 ± 1.1                              | 100 ± 0                                  |
| <i>rMrgB5</i> | 21.9 ± 18.1                               | 100 ± 0                                   | 2.4 ± 2.4                               | 1.9 ± 1.9                                | N.D.                                    | N.D.                                     |
| <i>rMrgC</i>  | 22.0 ± 2.2                                | 26.8 ± 7.9                                | N.D.                                    | N.D.                                     | 1.7 ± 1.7                               | 3.0 ± 3.0                                |
| <i>rMrgD</i>  | 0.9 ± 0.9                                 | 0.6 ± 0.6                                 | 5.5 ± 5.5                               | 1.2 ± 1.2                                | N.D.                                    | N.D.                                     |

At least three Sprague–Dawley adult DRGs were analyzed by confocal microscopy to determine the extent of colocalization between probe combinations. N.D., not done.
