# Supplementary material
Source: PubMed Central journal article supplement (PMC187757)

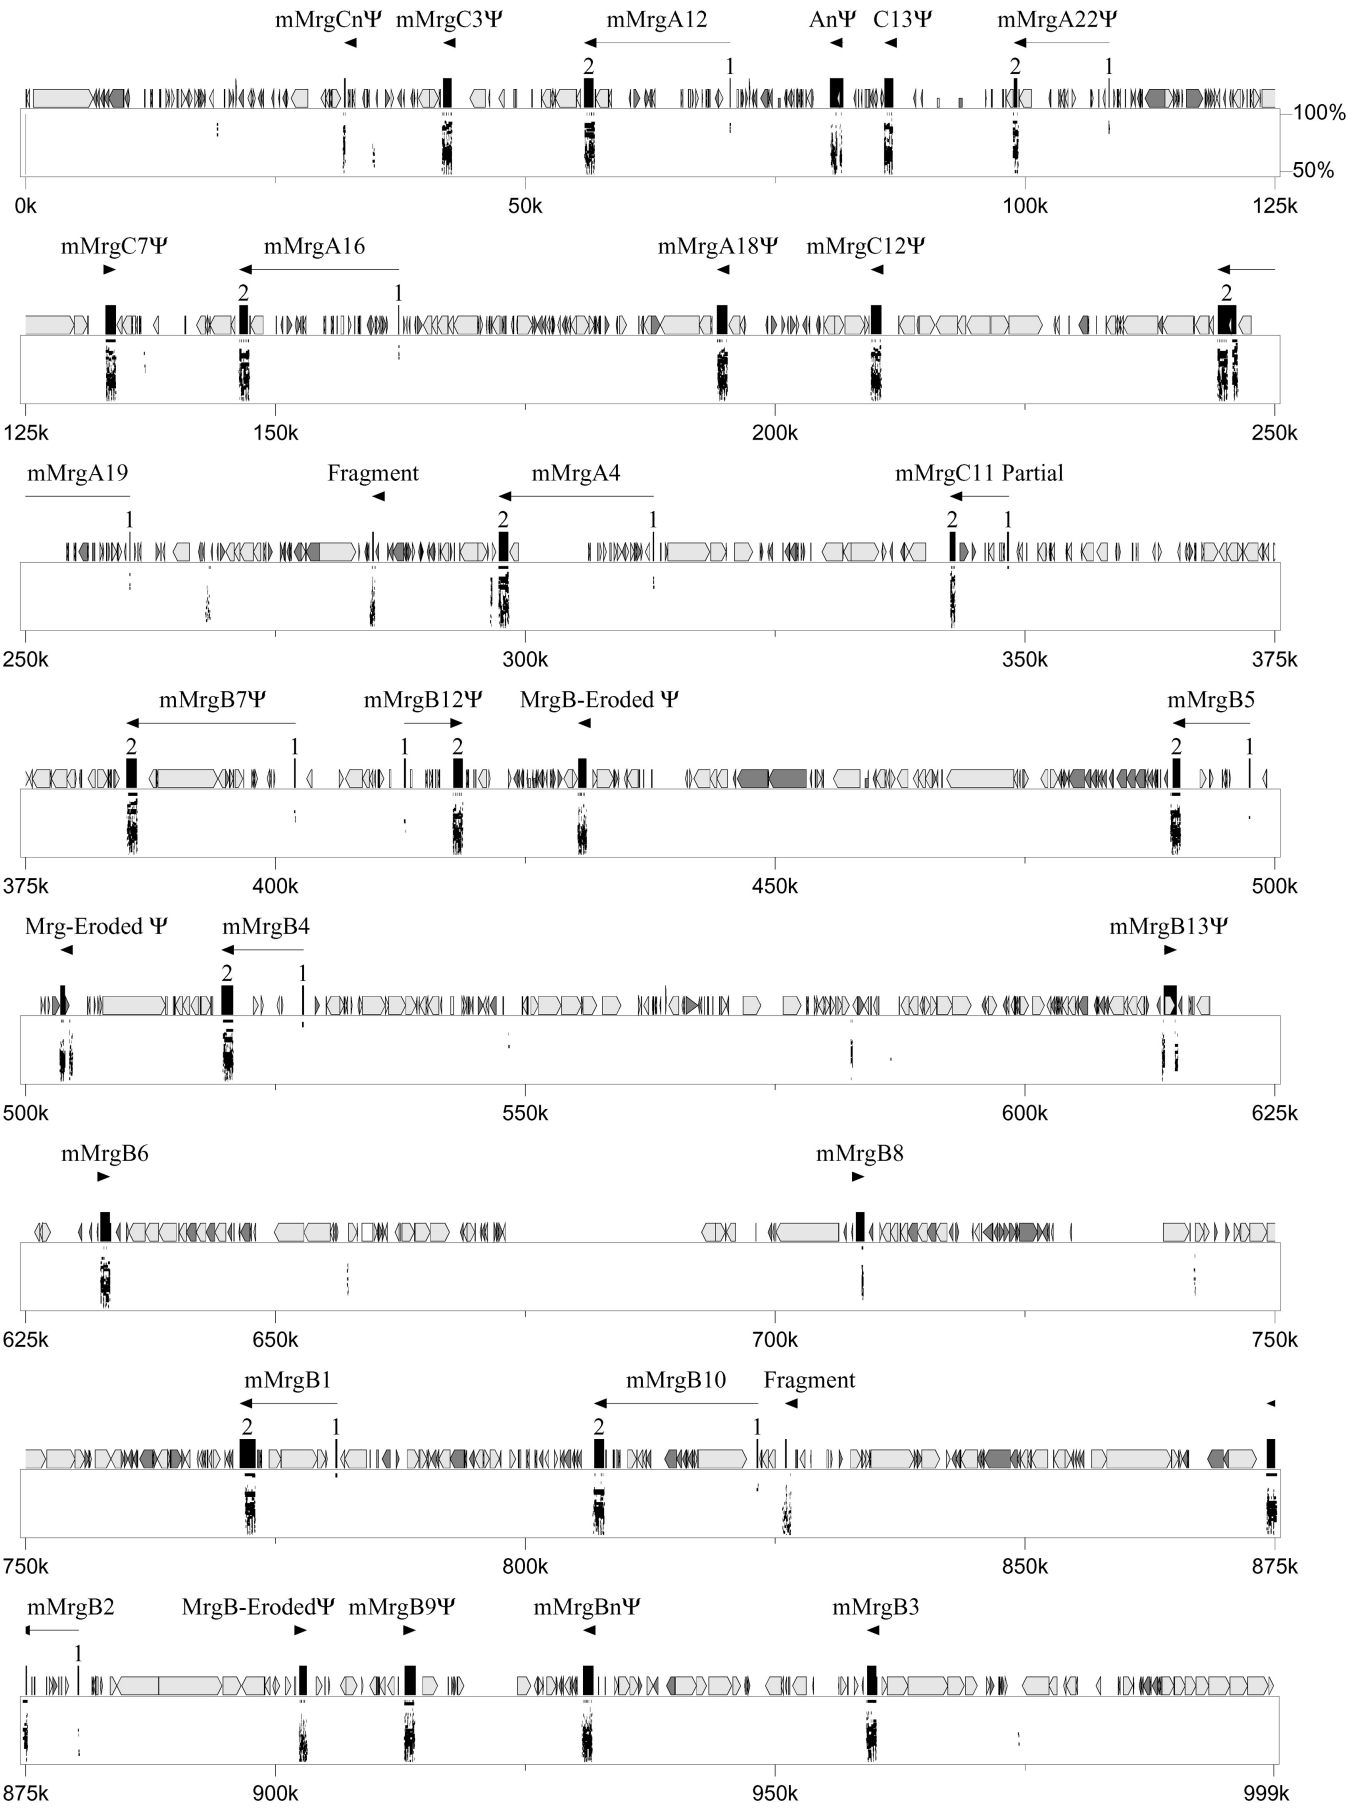

Supplement: pnas_100_17_10043__10.pdf [file pnas_100_17_10043__10.pdf]

Rat

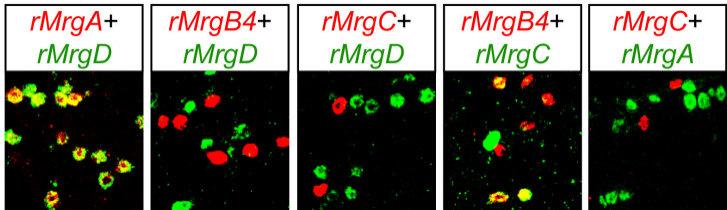

Mouse

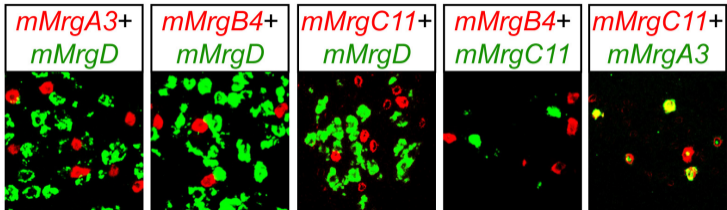

Supplement: pnas_100_17_10043__11.pdf [file pnas_100_17_10043__11.pdf]

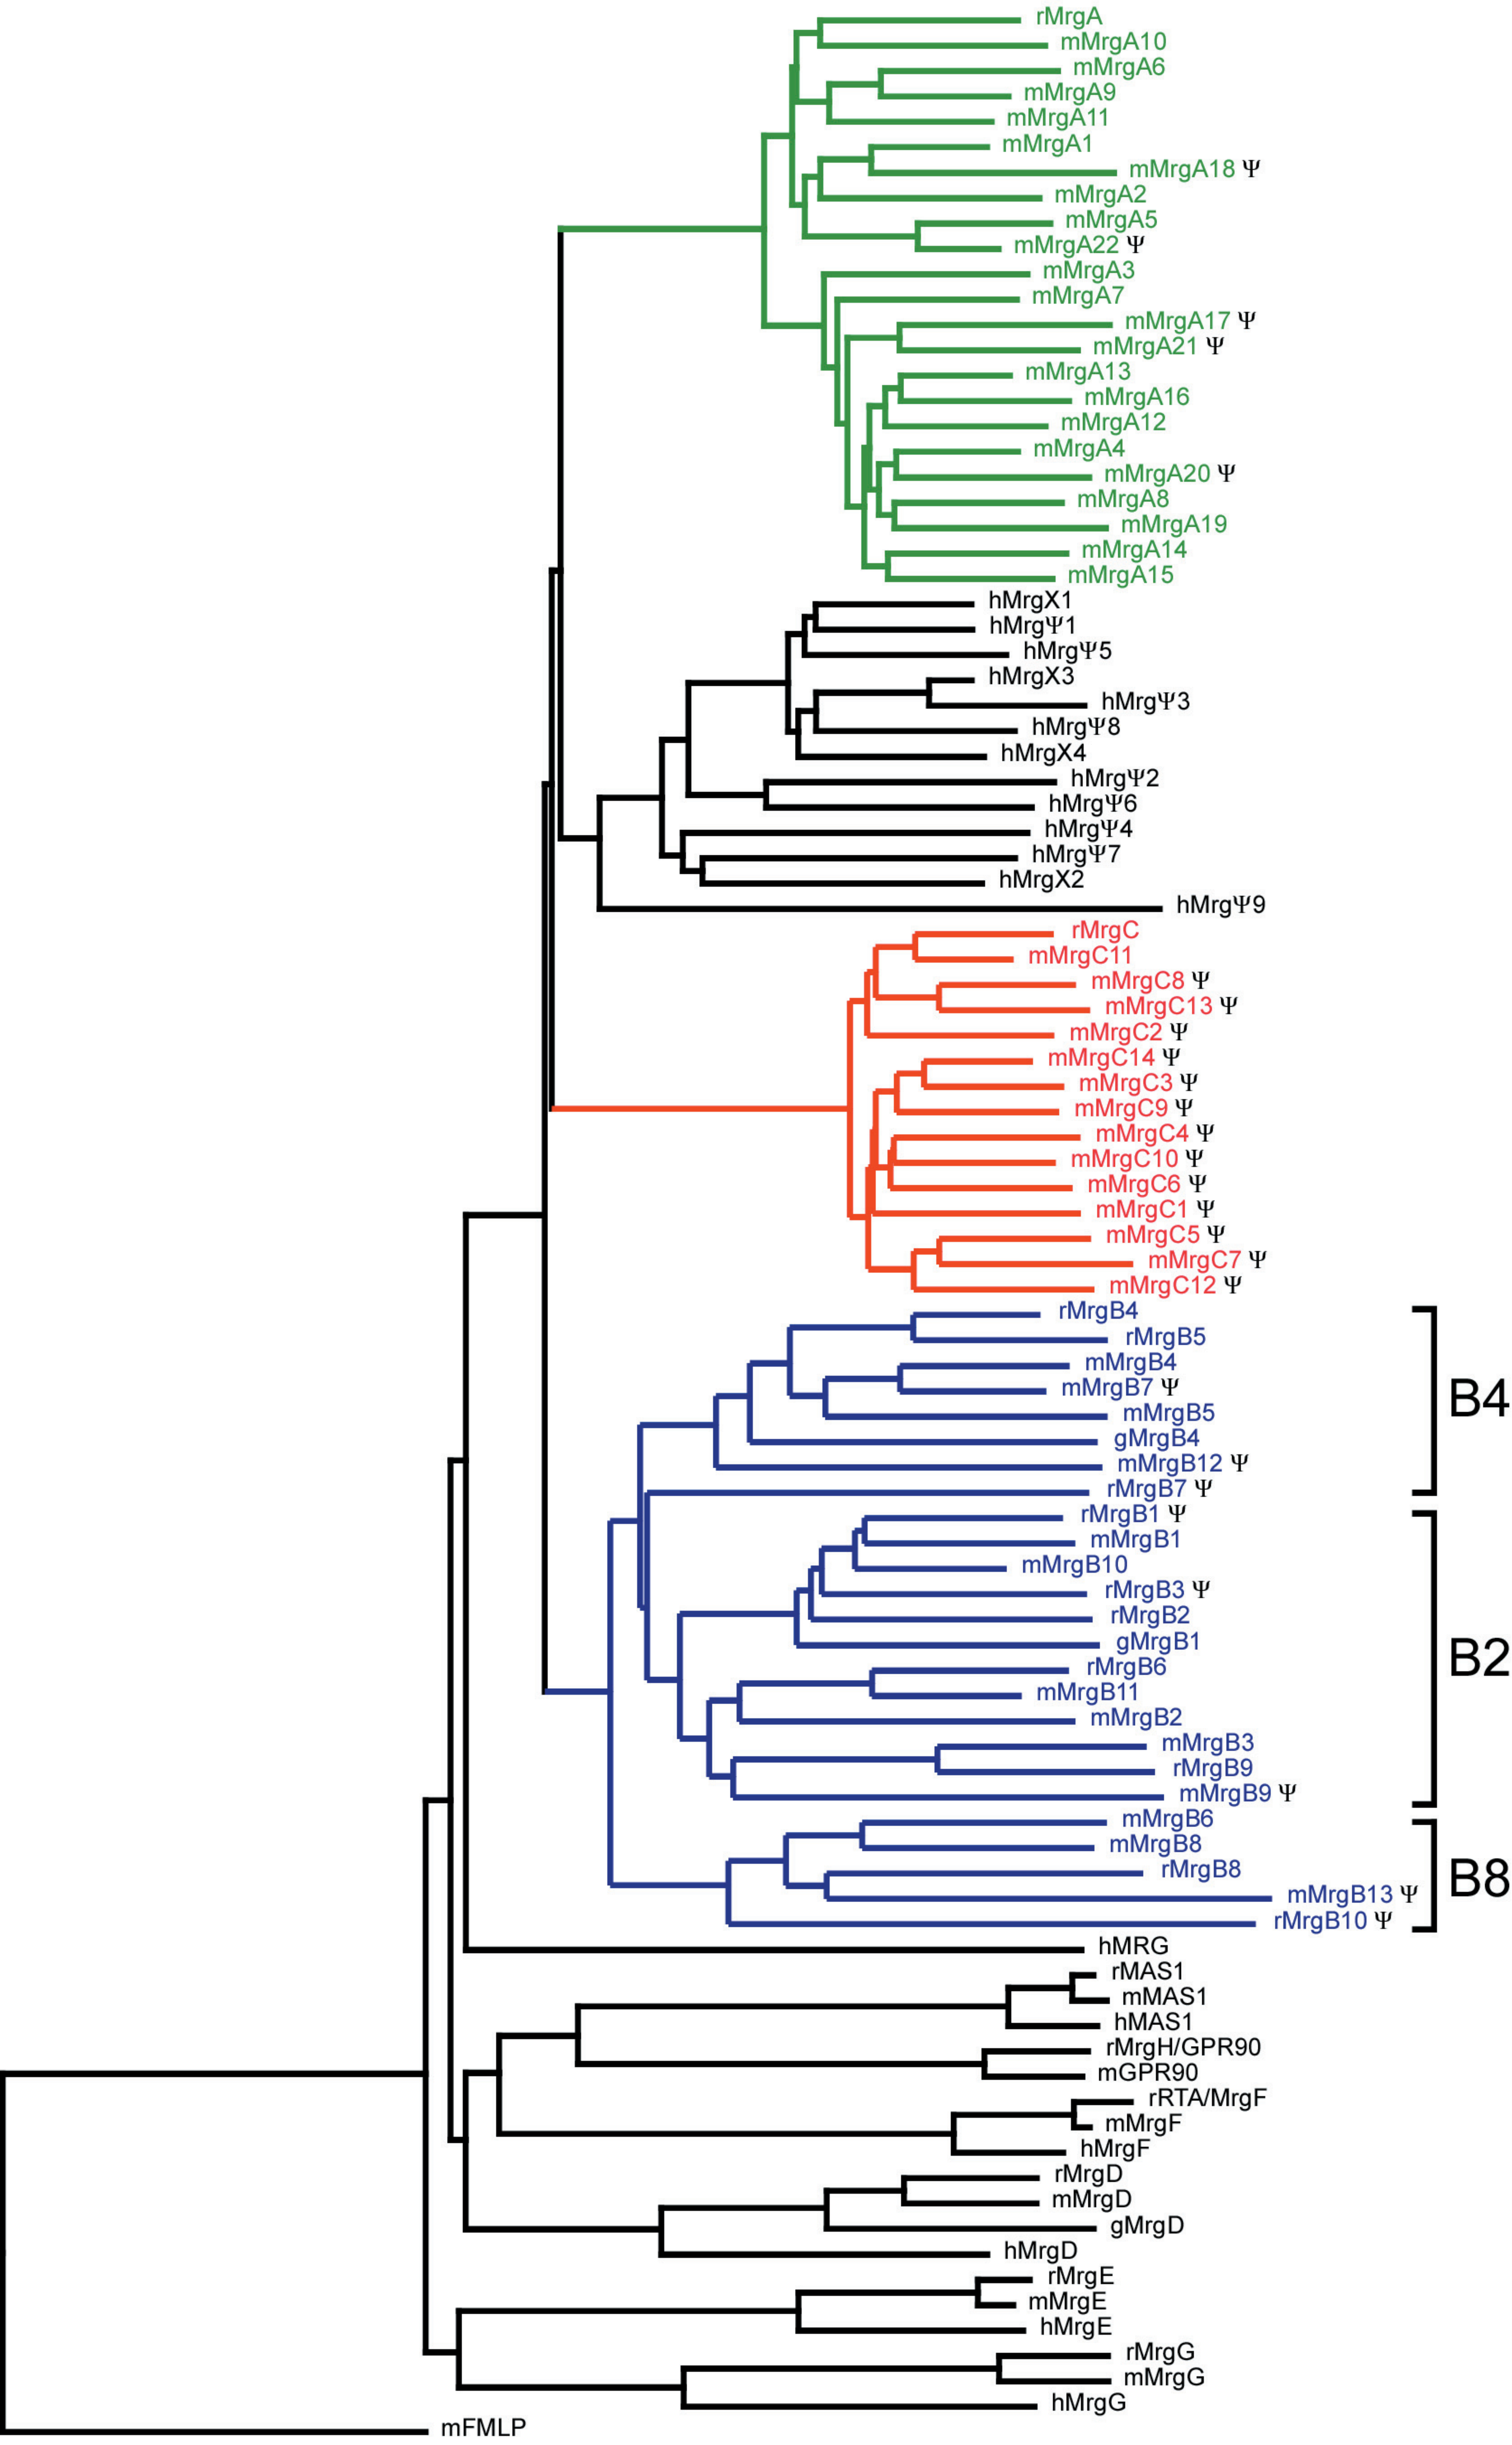

Supplement: pnas_100_17_10043__8.pdf [file pnas_100_17_10043__8.pdf]

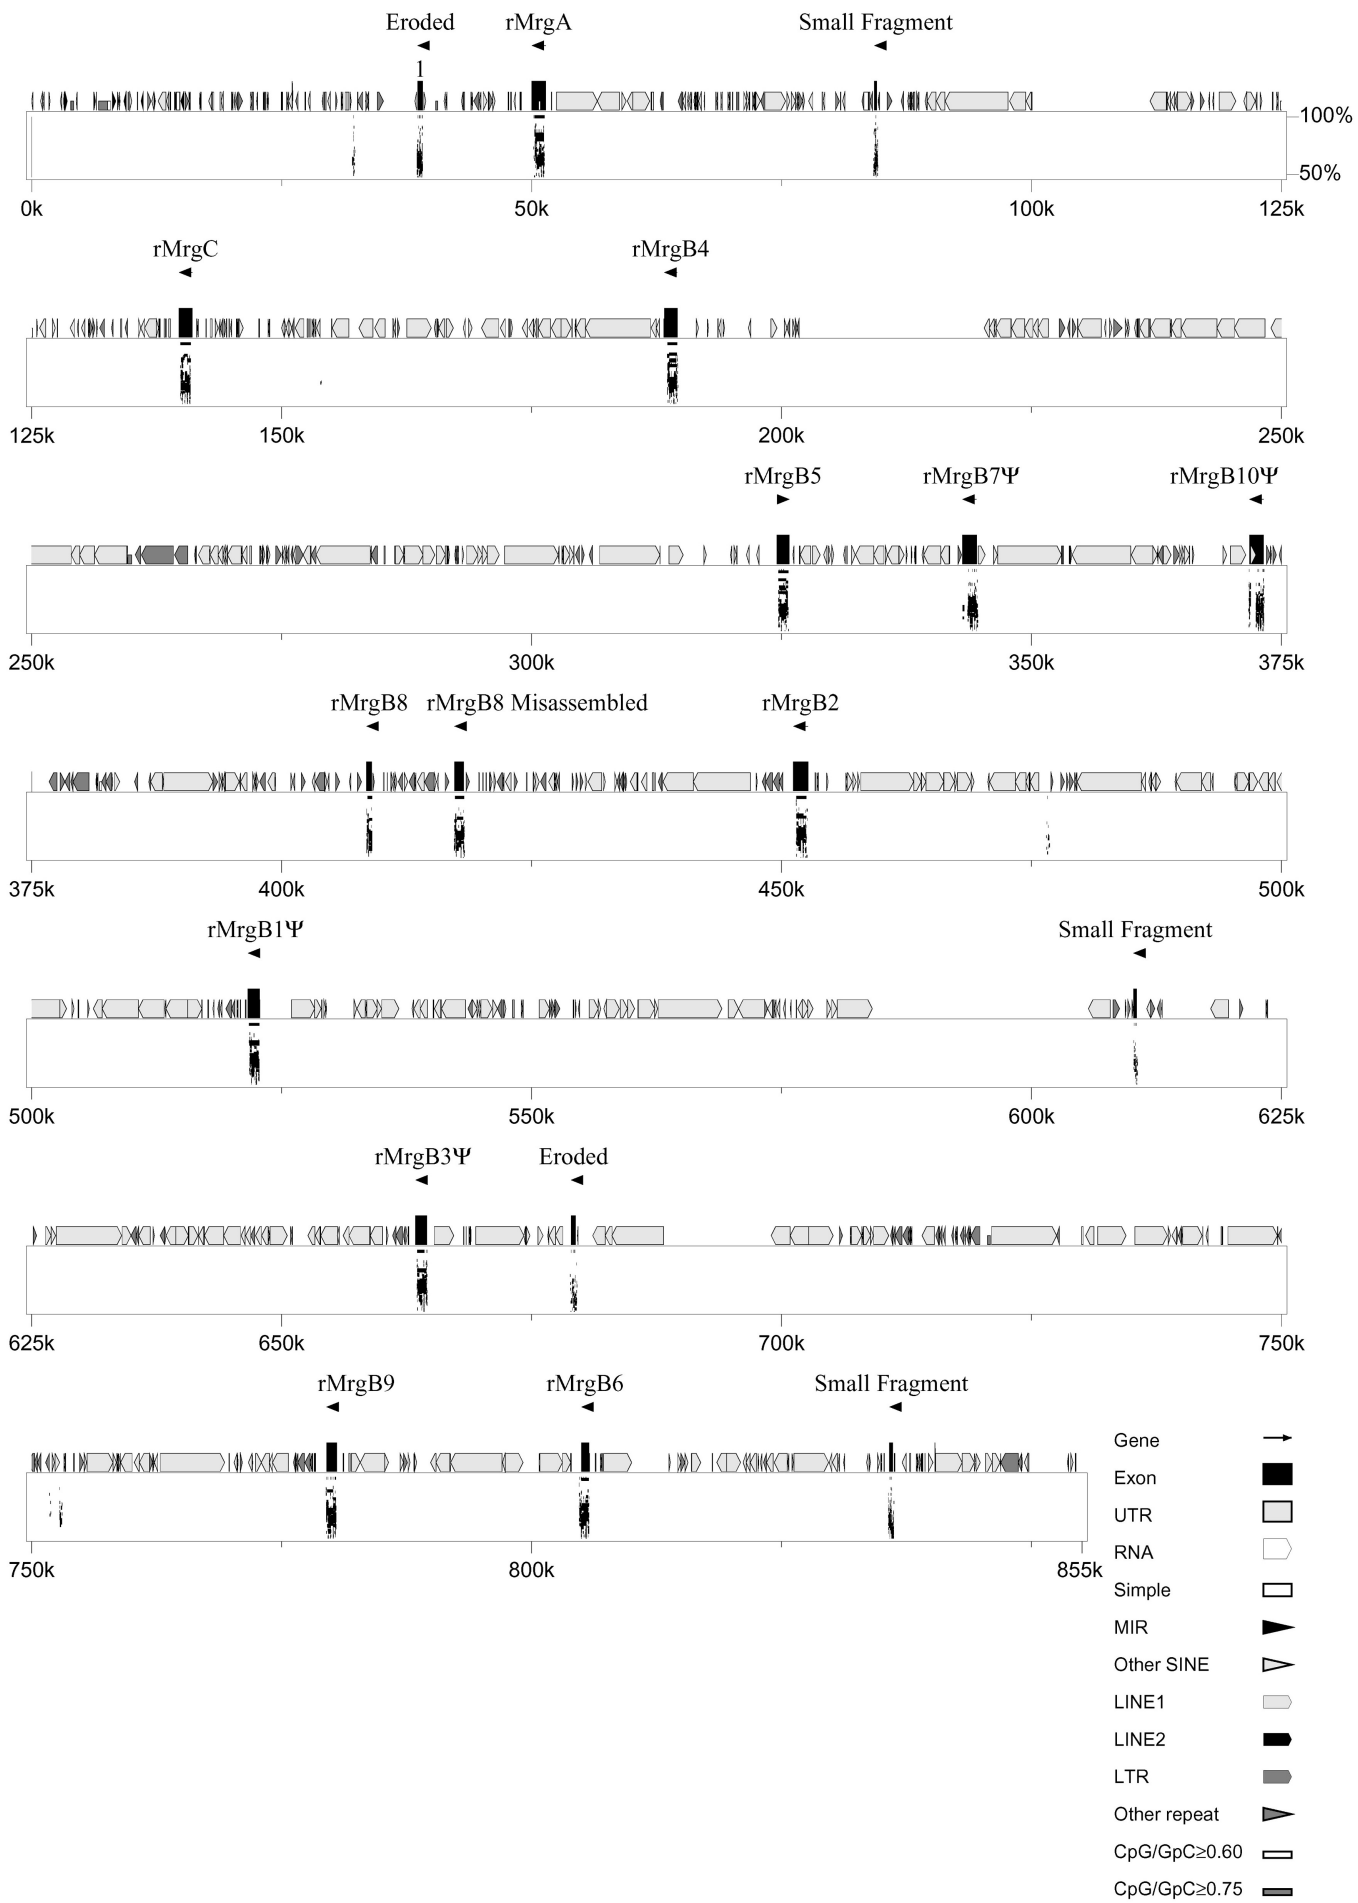

Supplement: pnas_100_17_10043__9.pdf [file pnas_100_17_10043__9.pdf]
